# Supplementary material for: Tissue-type plasminogen activator selectively inhibits multiple toll-like receptors in CSF-1-differentiated macrophages
Source: PubMed Central journal article supplement (PMC6837328; doi:10.1371/journal.pone.0224738), 2019-11-07

# Figure 1, panel E

Digital acquisition: Azure c300 Imaging System

## phospho-I $\kappa$ B $\alpha$ (Ser32)

40 kDa, 1:1000

Cell Signaling Technology, #2859

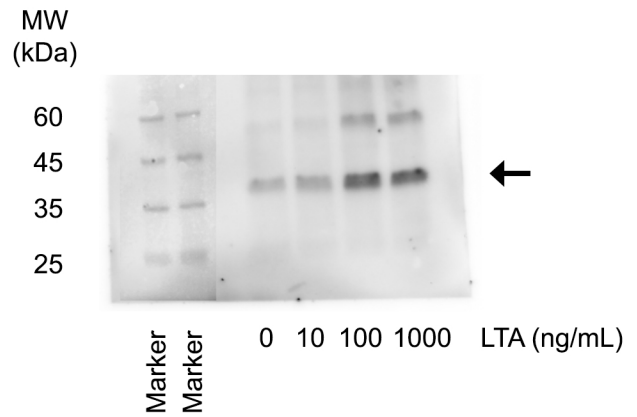

## I $\kappa$ B $\alpha$

39 kDa, 1:1000

Cell Signaling Technology, #9242

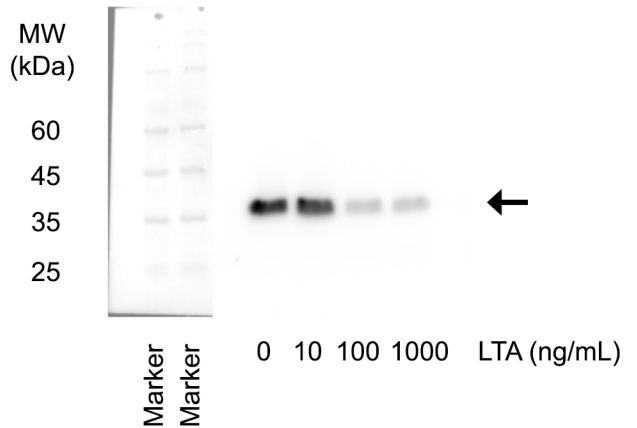

## $\beta$ -Actin

45 kDa, 1:5000

Cell Signaling Technology, #3700

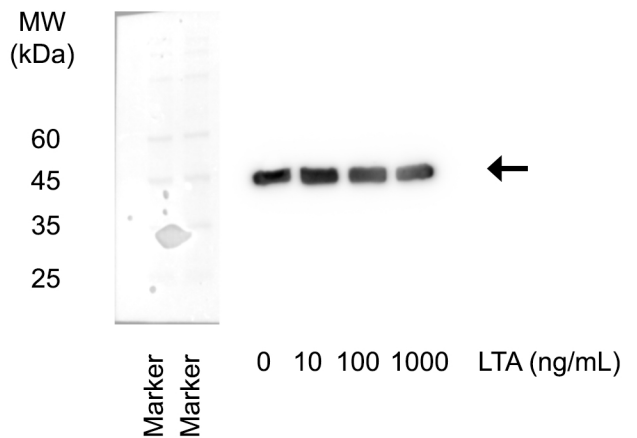

# Figure 1, panel F

Digital acquisition: Azure c300 Imaging System

**phospho-I $\kappa$ B $\alpha$  (Ser32)**  
40 kDa, 1:1000  
Cell Signaling Technology, #2859

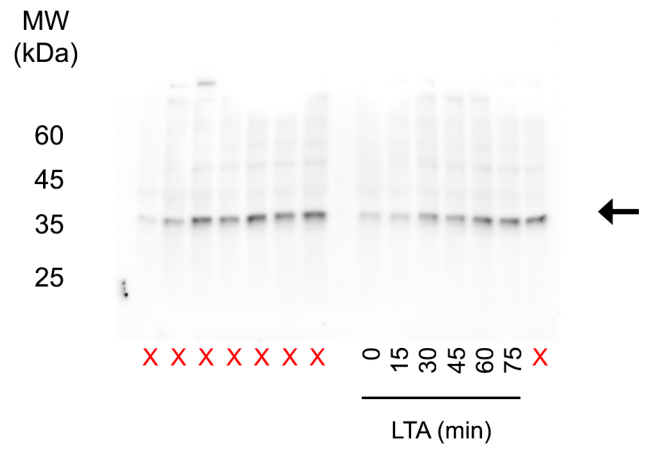

**I $\kappa$ B $\alpha$**   
39 kDa, 1:1000  
Cell Signaling Technology, #9242

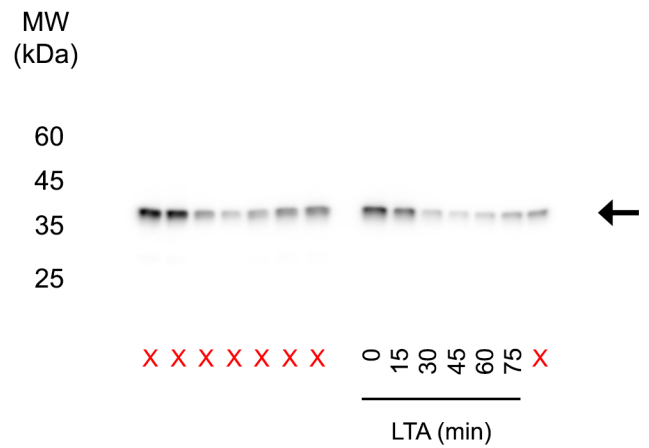

**$\beta$ -Actin**  
45 kDa, 1:5000  
Cell Signaling Technology, #3700

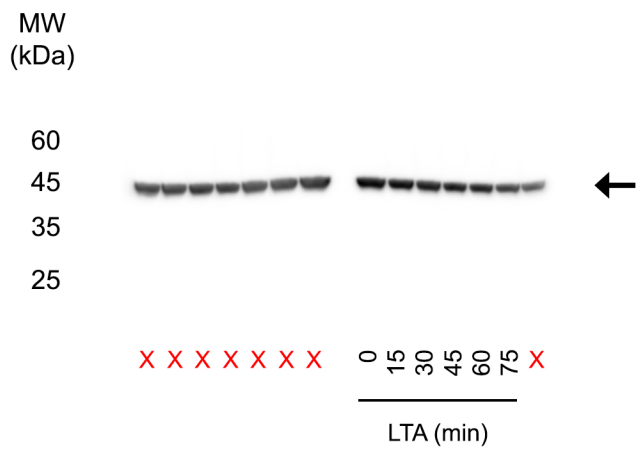

# Figure 1, panel G

Digital acquisition: Azure c300 Imaging System

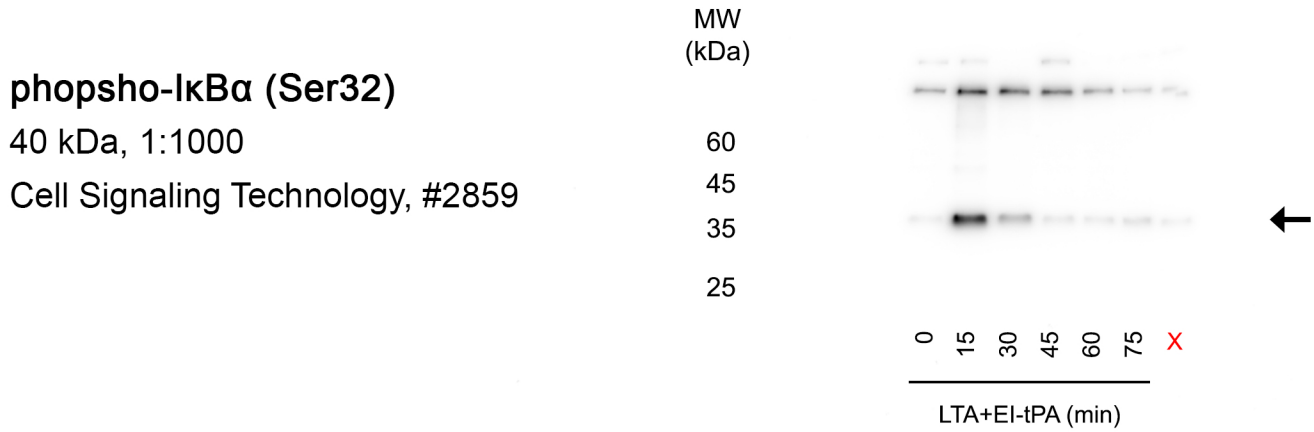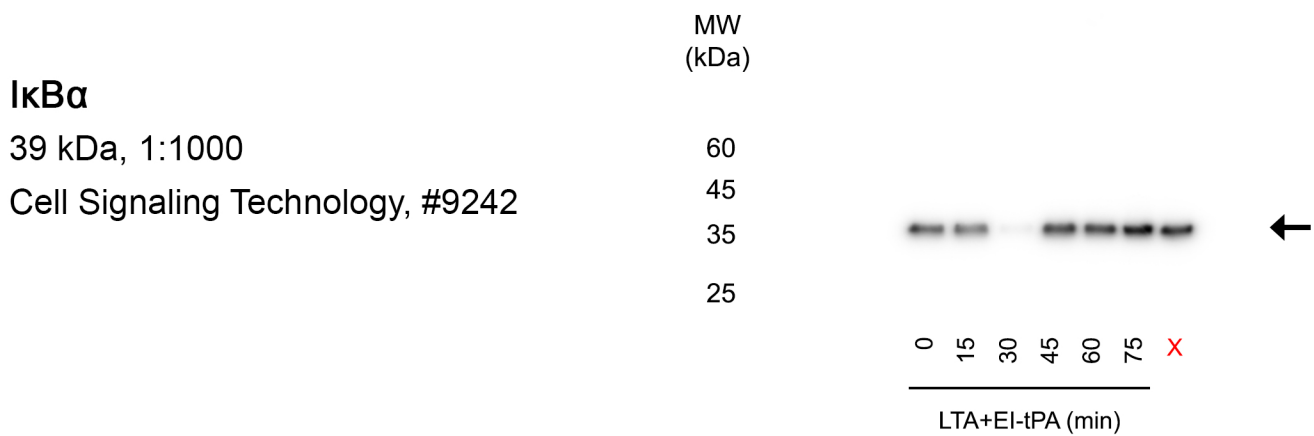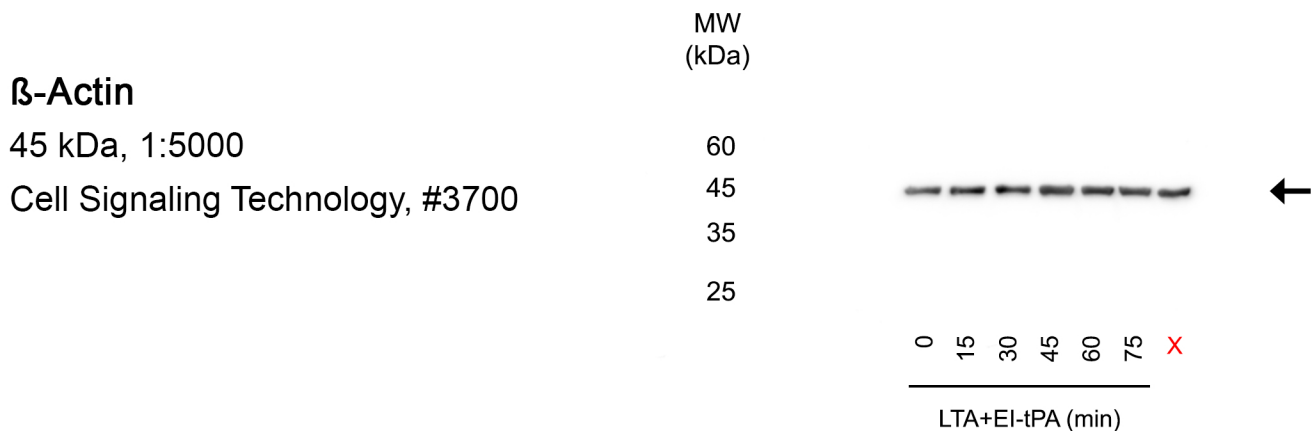

# Figure 2, panel E

Digital acquisition: Azure c300 Imaging System

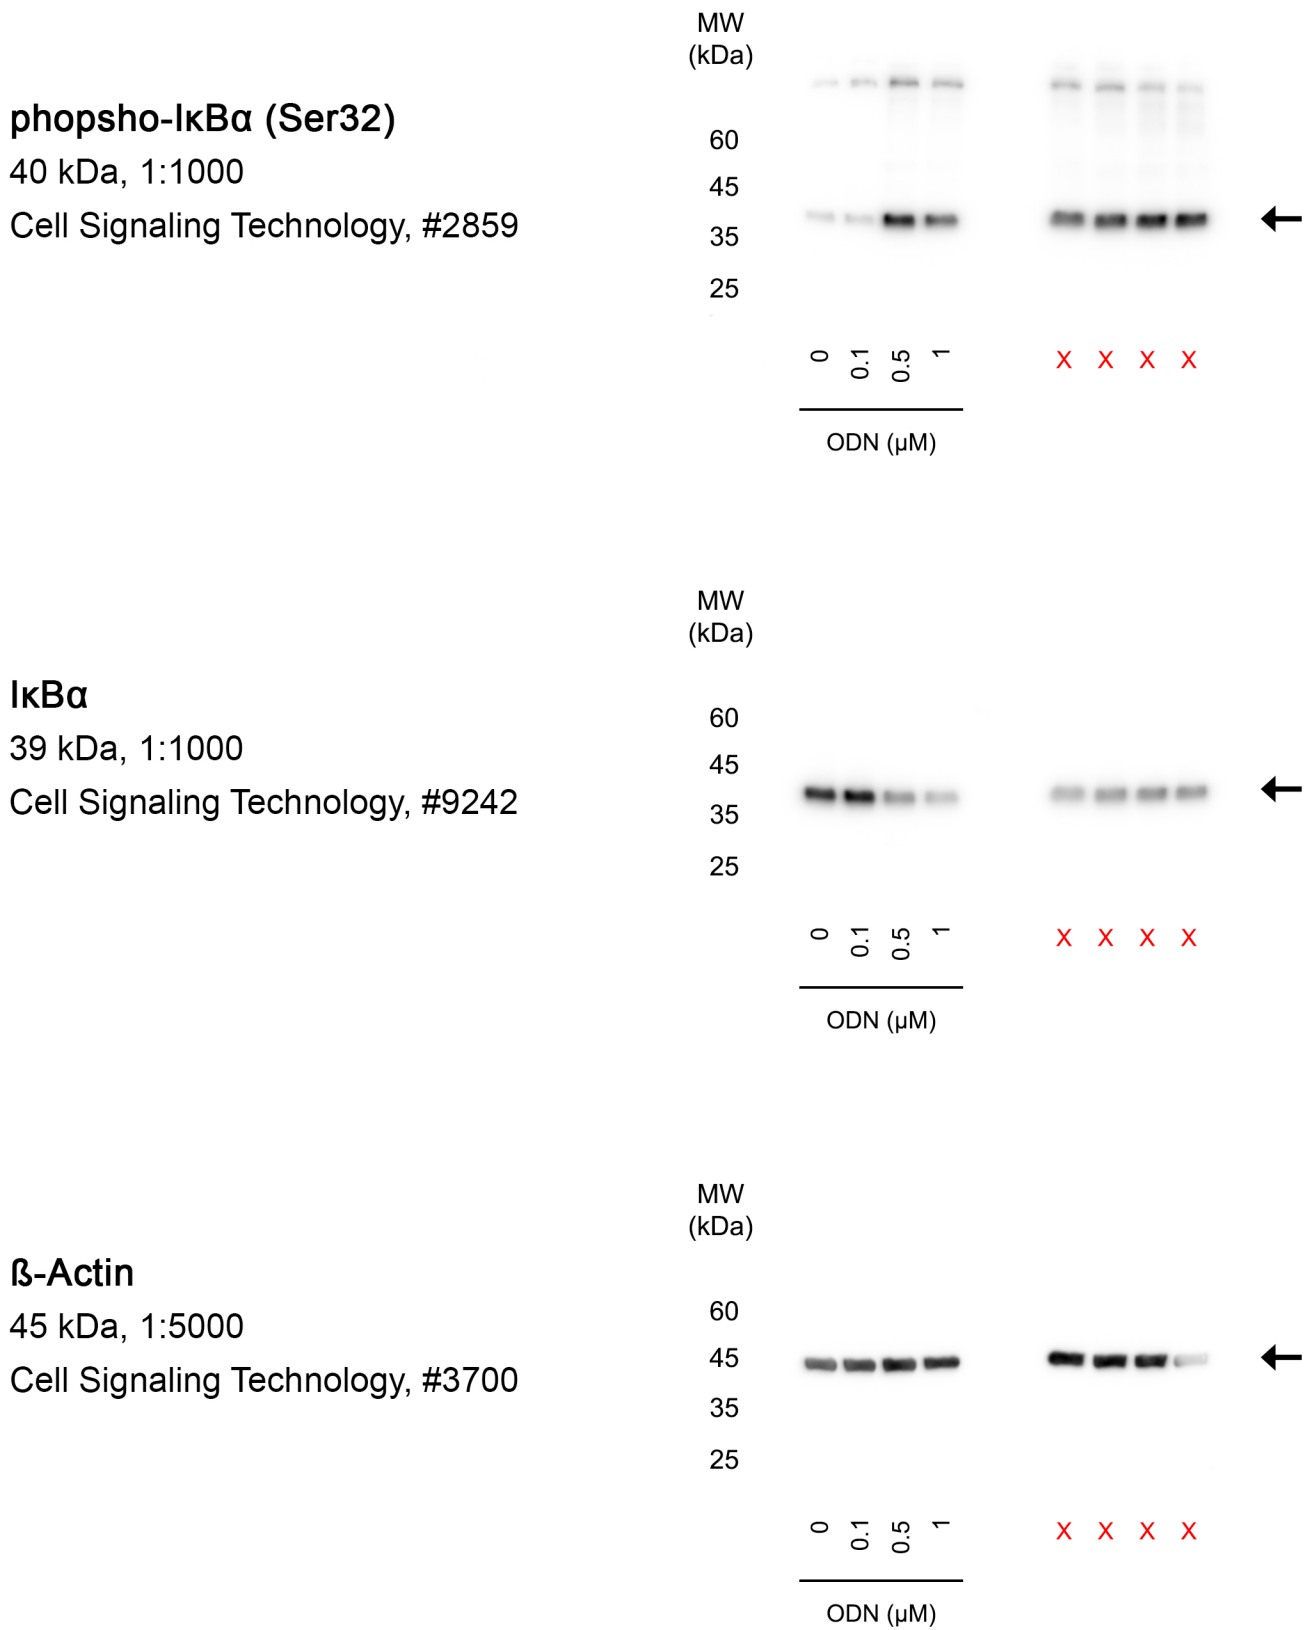

# Figure 2, panel F

Digital acquisition: Azure c300 Imaging System

**phopsho-I $\kappa$ B $\alpha$  (Ser32)**  
40 kDa, 1:1000  
Cell Signaling Technology, #2859

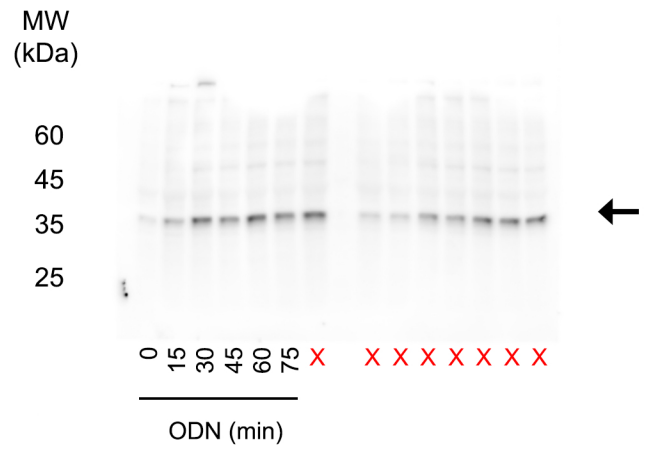

**I $\kappa$ B $\alpha$**   
39 kDa, 1:1000  
Cell Signaling Technology, #9242

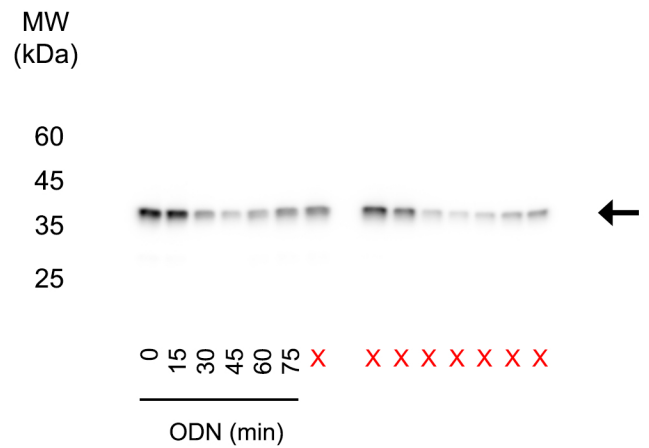

**$\beta$ -Actin**  
45 kDa, 1:5000  
Cell Signaling Technology, #3700

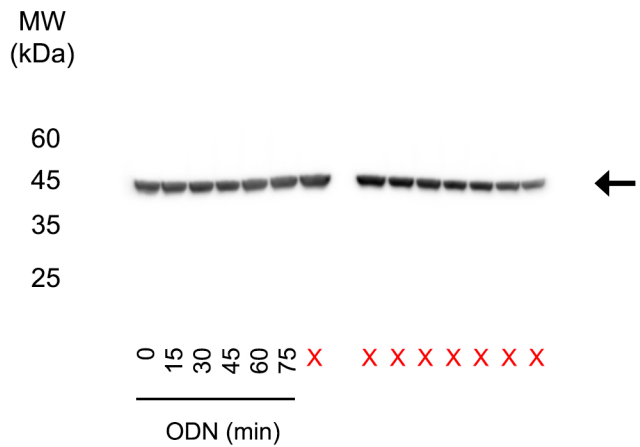

# Figure 2, panel G

Digital acquisition: Azure c300 Imaging System

## phospho-I $\kappa$ B $\alpha$ (Ser32)

40 kDa, 1:1000

Cell Signaling Technology, #2859

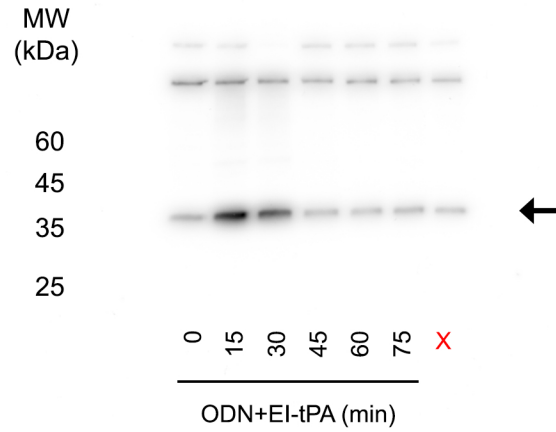

## I $\kappa$ B $\alpha$

39 kDa, 1:1000

Cell Signaling Technology, #9242

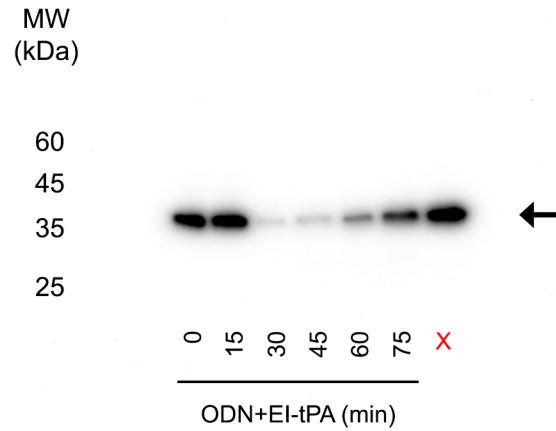

## $\beta$ -Actin

45 kDa, 1:5000

Cell Signaling Technology, #3700

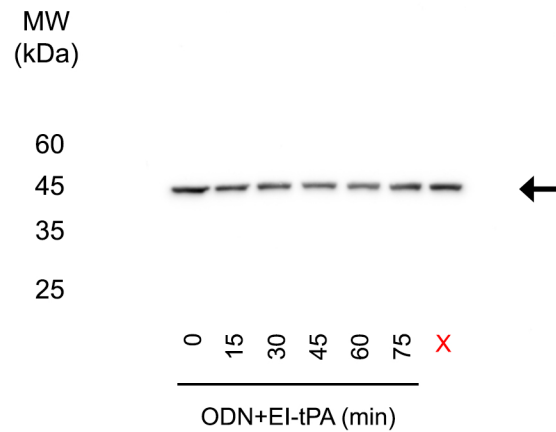

# Figure 3, panel C

Digital acquisition: Azure c300 Imaging System

## phospho-I $\kappa$ B $\alpha$ (Ser32)

40 kDa, 1:1000

Cell Signaling Technology, #2859

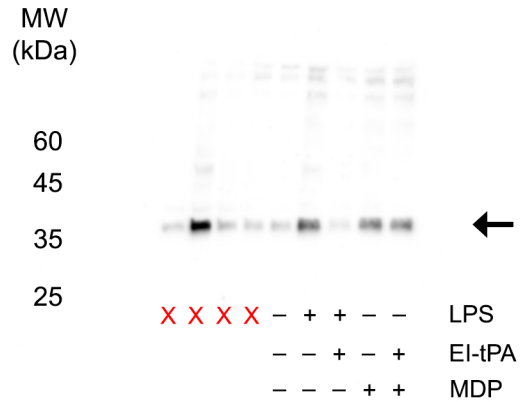

## I $\kappa$ B $\alpha$

39 kDa, 1:1000

Cell Signaling Technology, #9242

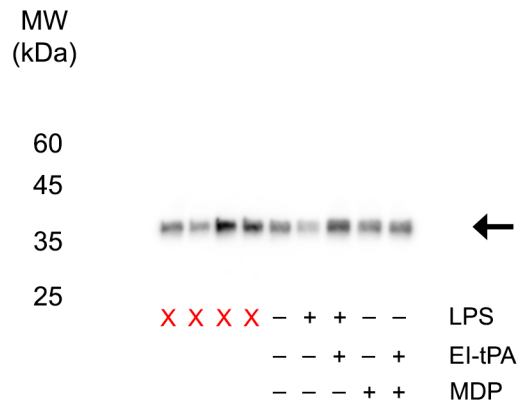

## $\beta$ -Actin

45 kDa, 1:5000

Cell Signaling Technology, #3700

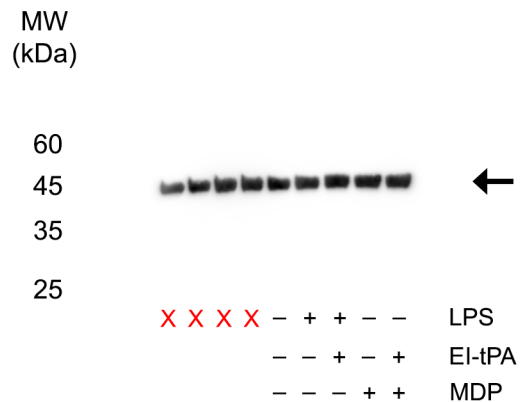

Supplement: pone.0224738.s001.pdf [file pone.0224738.s001.pdf]
